# Supplementary material
Source: ML conference proceedings conference paper supplement (https://openreview.net/forum?id=-WXCYvc5E-P)
Supplement: supplementary_material [file attachment]

## 478 A Proof

### 479 A.1 Technical Lemma

480 Before proving our theoretical results, we present two inequalities for supremum to clear the descrip-  
481 tion.

$$482 \quad 1. \sup_{x \in X} |f(x) + g(x)| \leq \sup_{x \in X} |f(x)| + \sup_{x \in X} |g(x)|$$

$$483 \quad 2. \left| \sup_{x \in X} f(x) - \sup_{x' \in X} g(x') \right| \leq \sup_{x, x' \in X} |f(x) - g(x')|$$

484 *Proof of 1.* Since  $|f(x) + g(x)| \leq |f(x)| + |g(x)|$  holds for all  $x \in X$ ,

$$\sup_{x \in X} |f(x) + g(x)| \leq \sup_{x \in X} (|f(x)| + |g(x)|) \leq \sup_{x \in X} |f(x)| + \sup_{x \in X} |g(x)|$$

485 ■

486 *Proof of 2.* Since  $|\|a\| - \|b\|| \leq \|a - b\|$  for any norm  $\|\cdot\|$  and for a large enough  $M$ ,

$$\begin{aligned} \sup_{x, x' \in X} |f(x) - g(x')| &\geq \sup_{x \in X} |f(x) - g(x)| = \sup_{x \in X} |(f(x) + M) - (g(x) + M)| \\ &\geq \left| \sup_{x \in X} (f(x) + M) - \sup_{x \in X} (g(x) + M) \right| \\ &= \left| \sup_{x \in X} f(x) - \sup_{x' \in X} g(x') \right| \end{aligned}$$

487 ■

### 488 A.2 Proof of Theorem A.3

489 **Theorem A.3.** If  $\xi_t$  converges to 1 uniformly on  $\Omega$ , then  $\mathbb{E}\mathcal{T}_{\xi_t}$  also converges to  $\mathbb{E}\mathcal{T}$  uniformly on  
490  $\mathcal{Z}$  for all  $s \in \mathcal{S}$  and  $a \in \mathcal{A}$ .

491 *Proof.* Recall that  $\mathcal{Z} = \left\{ Z : \mathcal{S} \times \mathcal{A} \rightarrow \mathcal{P}(\mathbb{R}) \mid \mathbb{E}[|Z(s, a)|] \leq V_{\max}, \forall (s, a) \right\}$ . Then for any  $Z \in \mathcal{Z}$   
492 and  $\xi \in \Xi$ ,

$$\mathbb{E}[|\mathcal{T}_{\xi} Z|] \leq R_{\max} + \gamma \frac{R_{\max}}{1 - \gamma} = \frac{R_{\max}}{1 - \gamma} = V_{\max}.$$

493 which implies PDBOO is closed in  $\mathcal{Z}$ , i.e.  $\mathcal{T}_{\xi} Z \in \mathcal{Z}$  for all  $\xi \in \Xi$ . Hence, for any sequence  $\xi_t$ ,  
494  $Z^{(n)} = \mathcal{T}_{\xi_{n:1}} Z \in \mathcal{Z}$  for any  $n \geq 0$ .

495 Since  $\xi_t$  converges to 1 uniformly on  $\Omega$ , there exists  $T$  such that for any  $t > T$ ,

$$\sup_{w \in \Omega} |\xi_t(w) - 1| \leq \epsilon.$$

496 For any  $Z \in \mathcal{Z}$ ,  $s \in \mathcal{S}$ ,  $a \in \mathcal{A}$ , and  $t > T$ , by using Hölder's inequality,

$$\begin{aligned} \sup_{Z \in \mathcal{Z}} \sup_{s, a} |\mathbb{E}_{\xi_t}[Z(s, a)] - \mathbb{E}[Z(s, a)]| &= \sup_{Z \in \mathcal{Z}} \sup_{s, a} \left| \int_{w \in \Omega} (1 - \xi_t(w)) Z(s, a, w) \mathbb{P}(w) dw \right| \\ &\leq \sup_{w \in \Omega} |\xi_t(w) - 1| \sup_{Z \in \mathcal{Z}} \sup_{s, a} \left| \int_{w \in \Omega} |Z(s, a, w)| \mathbb{P}(w) dw \right| \\ &\leq \epsilon V_{\max} \end{aligned}$$

497 which implies that  $\mathbb{E}_{\xi_t}$  converges to  $\mathbb{E}$  uniformly on  $\mathcal{Z}$  for all  $s, a$ .

498 By using A.1, we can get the desired result.

$$\begin{aligned}
& \sup_{Z \in \mathcal{Z}} \sup_{s, a} |\mathbb{E}[\mathcal{T}_{\xi_t} Z(s, a)] - \mathbb{E}[\mathcal{T} Z(s, a)]| \\
& \leq \sup_{Z \in \mathcal{Z}} \sup_{s, a} |\mathbb{E}[\mathcal{T}_{\xi_t} Z(s, a)] - \mathbb{E}_{\xi_t}[\mathcal{T}_{\xi_t} Z(s, a)]| + \sup_{Z \in \mathcal{Z}} \sup_{s, a} |\mathbb{E}_{\xi_t}[\mathcal{T}_{\xi_t} Z(s, a)] - \mathbb{E}[\mathcal{T} Z(s, a)]| \\
& \leq \epsilon V_{\max} + \gamma \sup_{Z \in \mathcal{Z}} \sup_{s, a} \mathbb{E}_{s'} \left[ \left| \sup_{a'} \mathbb{E}_{\xi_t}[Z(s', a')] - \sup_{a''} \mathbb{E}[Z(s', a'')] \right| \right] \\
& \leq \epsilon V_{\max} + \gamma \sup_{Z \in \mathcal{Z}} \sup_{s', a'} |\mathbb{E}_{\xi_t}[Z(s', a')] - \mathbb{E}[Z(s', a')]| \\
& \leq \epsilon V_{\max} + \gamma \epsilon V_{\max} \\
& = (1 + \gamma) \epsilon V_{\max}.
\end{aligned}$$

499

■

### 500 A.3 Proof of Theorem 3.2

501 **Theorem 3.2.** For a sequence of bound  $\Delta_n$ , let  $\bar{\mathcal{U}}_{\Delta_n}(Z^{(n-1)}) := \bigcap_{s, a} \mathcal{U}_{\Delta_n}(Z^{(n-1)}(s, a))$ . If we  
502 sample  $\xi_n$  from  $\bar{\mathcal{U}}_{\Delta_n}(Z^{(n-1)})$  for every iteration and  $\sum_{n=1}^{\infty} \Delta_n < \infty$  holds, then, the expectation of  
503 iterated operator  $\mathcal{T}_{\xi_{n:1}}$  has a fixed point  $\mathbb{E}[Z^*]$ . Moreover, the following bound holds,

$$\sup_{s, a} \left| \mathbb{E}[Z^{(n)}(s, a)] - \mathbb{E}[Z^*(s, a)] \right| \leq \sum_{k=n}^{\infty} \left( 2\gamma^{k-1} V_{\max} + 2 \sum_{i=1}^k \gamma^i (\Delta_{k+2-i} + \Delta_{k+1-i}) \right).$$

504 *Proof.* We denote  $a_i^*(\xi_n) = \operatorname{argmax}_{a'} \mathbb{E}_{\xi_n}[Z_i^{(n-1)}(s', a')]$  as the greedy action of  $Z_i^{(n-1)}$  under  
505 perturbation  $\xi_n$ . Also, we denote  $\sup_{s, a} |\cdot|$  which is the supremum norm over  $s$  and  $a$  as  $\|\cdot\|_{sa}$ .

506 Before we start from the term  $\|\mathbb{E}[Z^{(k+1)}] - \mathbb{E}[Z^{(k)}]\|_{sa}$ , for a given  $(s, a)$ ,

$$\begin{aligned}
& \left| \mathbb{E}[Z^{(k+1)}(s, a)] - \mathbb{E}[Z^{(k)}(s, a)] \right| \\
& \leq \gamma \sup_{s'} \left| \mathbb{E}[Z^{(k)}(s', a^*(\xi_{k+1}))] - \mathbb{E}[Z^{(k-1)}(s', a^*(\xi_k))] \right| \\
& \leq \gamma \sup_{s'} \left( \left| \mathbb{E}[Z^{(k)}(s', a^*(\xi_{k+1}))] - \max_{a'} \mathbb{E}[Z^{(k)}(s', a')] \right| + \left| \max_{a'} \mathbb{E}[Z^{(k)}(s', a')] \right. \right. \\
& \quad \left. \left. - \max_{a'} \mathbb{E}[Z^{(k-1)}(s', a')] \right| + \left| \max_{a'} \mathbb{E}[Z^{(k-1)}(s', a')] - \mathbb{E}[Z^{(k-1)}(s', a^*(\xi_k))] \right| \right) \\
& \leq \gamma \sup_{s', a'} \left| \mathbb{E}[Z^{(k)}(s', a')] - \mathbb{E}[Z^{(k-1)}(s', a')] \right| + \gamma \sum_{i=k-1}^k \sup_{s'} \left( \left| \mathbb{E}[Z^{(i)}(s', a^*(\xi_{i+1}))] \right. \right. \\
& \quad \left. \left. - \max_{a'} \mathbb{E}[Z^{(i)}(s', a')] \right| \right) \\
& \leq \gamma \left\| \mathbb{E}[Z^{(k)}] - \mathbb{E}[Z^{(k-1)}] \right\|_{sa} + \gamma \sum_{i=k-1}^k \sup_{s'} \left( \left| \mathbb{E}[Z^{(i)}(s', a^*(\xi_{i+1}))] \right. \right. \\
& \quad \left. \left. - \mathbb{E}_{\xi_{i+1}}[Z^{(i)}(s', a^*(\xi_{i+1}))] \right| + \left| \max_{a'} \mathbb{E}_{\xi_{i+1}}[Z^{(i)}(s', a')] - \max_{a''} \mathbb{E}[Z^{(i)}(s', a'')] \right| \right) \\
& \leq \gamma \left\| \mathbb{E}[Z^{(k)}] - \mathbb{E}[Z^{(k-1)}] \right\|_{sa} + 2\gamma \sum_{i=k-1}^k \sup_{s', a'} \left( \left| \mathbb{E}[Z^{(i)}(s', a')] - \mathbb{E}_{\xi_{i+1}}[Z^{(i)}(s', a')] \right| \right) \\
& \leq \gamma \left\| \mathbb{E}[Z^{(k)}] - \mathbb{E}[Z^{(k-1)}] \right\|_{sa} + 2\gamma \sum_{i=k-1}^k \Delta_{i+1}
\end{aligned}$$

507 where we use A.1.1 in third and fifth line and A.1.2 in sixth line.

508 Taking a supremum over  $s$  and  $a$ , then for all  $k > 0$ ,

$$\begin{aligned}
\left\| \mathbb{E}[Z^{(k+1)}] - \mathbb{E}[Z^{(k)}] \right\|_{sa} &\leq \gamma \left\| \mathbb{E}[Z^{(k)}] - \mathbb{E}[Z^{(k-1)}] \right\|_{sa} + 2 \sum_{i=k-1}^k \gamma \Delta_{i+1} \\
&\leq \gamma^2 \left\| \mathbb{E}[Z^{(k-1)}] - \mathbb{E}[Z^{(k-2)}] \right\|_{sa} + 2 \sum_{i=k-2}^{k-1} \gamma^2 \Delta_{i+1} + 2 \sum_{i=k-1}^k \gamma \Delta_{i+1} \\
&\vdots \\
&\leq \gamma^k \left\| \mathbb{E}[Z^{(1)}] - \mathbb{E}[Z] \right\|_{sa} + 2 \sum_{i=1}^k \gamma^i (\Delta_{k+2-i} + \Delta_{k+1-i}) \\
&\leq 2\gamma^k V_{\max} + 2 \sum_{i=1}^k \gamma^i (\Delta_{k+2-i} + \Delta_{k+1-i})
\end{aligned}$$

509 Since  $\sum_{i=1}^{\infty} \gamma^i = \frac{\gamma}{1-\gamma} < \infty$  and  $\sum_{i=1}^{\infty} \Delta_i < \infty$  by assumption, we have

$$\sum_{i=1}^k \gamma^i \Delta_{k+1-i} \rightarrow 0$$

510 which is resulted from the convergence of Cauchy product of two sequences  $\{\gamma^i\}$  and  $\{\Delta_i\}$ . Hence,  
511  $\{\mathbb{E}[Z^{(k)}]\}$  is a Cauchy sequence and therefore converges for every  $Z \in \mathcal{Z}$ .

512 Let  $\mathbb{E}[Z^*]$  be the limit point of the sequence  $\{\mathbb{E}[Z^{(n)}]\}$ . Then,

$$\begin{aligned}
\left\| \mathbb{E}[Z^*] - \mathbb{E}[Z^{(n)}] \right\|_{sa} &= \lim_{l \rightarrow \infty} \left\| \mathbb{E}[Z^{(n+l)}] - \mathbb{E}[Z^{(n)}] \right\|_{sa} \\
&\leq \sum_{k=n}^{\infty} \left\| \mathbb{E}[Z^{(k+1)}] - \mathbb{E}[Z^{(k)}] \right\|_{sa} \\
&= \sum_{k=n}^{\infty} \left( 2\gamma^k V_{\max} + 2 \sum_{i=1}^k \gamma^i (\Delta_{k+2-i} + \Delta_{k+1-i}) \right).
\end{aligned}$$

513 ■

#### 514 A.4 Proof of Theorem 3.3

515 **Theorem 3.3.** If  $\{\Delta_n\}$  follows the assumption in Theorem 3.2, then  $\mathbb{E}[Z^*]$  is the unique solution of  
516 Bellman optimality equation.

517 *Proof.* The proof follows by linearity of expectation. Denote the Q-value based operator as  $\bar{\mathcal{T}}$ . Note  
518 that  $\Delta_n$  converges to 0 with regularity of  $\mathcal{Z}$  implies that  $\xi_n$  converges to 1 uniformly on  $\Omega$ . By  
519 Theorem A.3, for a given  $\epsilon > 0$ , there exists a constant  $K = \max(K_1, K_2)$  such that for every  
520  $k \geq K_1$ ,

$$\sup_{Z \in \mathcal{Z}} \|\bar{\mathcal{T}}_{\xi_k} \mathbb{E}[Z] - \bar{\mathcal{T}} \mathbb{E}[Z]\|_{sa} \leq \frac{\epsilon}{2}.$$

521 Since  $\bar{\mathcal{T}}$  is continuous, for every  $k \geq K_2$ ,

$$\|\bar{\mathcal{T}} \mathbb{E}[Z^{(k)}] - \bar{\mathcal{T}} \mathbb{E}[Z^*]\|_{sa} \leq \frac{\epsilon}{2}.$$

522 Thus, it holds that

$$\begin{aligned}
\|\bar{\mathcal{T}}_{\xi_{k+1}} \mathbb{E}[Z^{(k)}] - \bar{\mathcal{T}} \mathbb{E}[Z^*]\|_{sa} &\leq \|\bar{\mathcal{T}}_{\xi_{k+1}} \mathbb{E}[Z^{(k)}] - \bar{\mathcal{T}} \mathbb{E}[Z^{(k)}]\|_{sa} + \|\bar{\mathcal{T}} \mathbb{E}[Z^{(k)}] - \bar{\mathcal{T}} \mathbb{E}[Z^*]\|_{sa} \\
&\leq \sup_{Z \in \mathcal{Z}} \|\bar{\mathcal{T}}_{\xi_{k+1}} \mathbb{E}[Z] - \bar{\mathcal{T}} \mathbb{E}[Z]\|_{sa} + \|\bar{\mathcal{T}} \mathbb{E}[Z^{(k)}] - \bar{\mathcal{T}} \mathbb{E}[Z^*]\|_{sa} \\
&\leq \frac{\epsilon}{2} + \frac{\epsilon}{2} \\
&= \epsilon.
\end{aligned}$$

Therefore, we have

$$\mathbb{E}[Z^*] = \lim_{k \rightarrow \infty} \mathbb{E}[Z^{(k)}] = \lim_{k \rightarrow \infty} \mathbb{E}[Z^{(k+1)}] = \lim_{k \rightarrow \infty} \mathbb{E}[\mathcal{T}_{\xi_{k+1}} Z^{(k)}] = \lim_{k \rightarrow \infty} \bar{\mathcal{T}}_{\xi_{k+1}} \mathbb{E}[Z^{(k)}] = \bar{\mathcal{T}} \mathbb{E}[Z^*]$$

Since the standard Bellman optimality operator has a unique solution, we derived the desired result. ■

## B Algorithm Pipeline

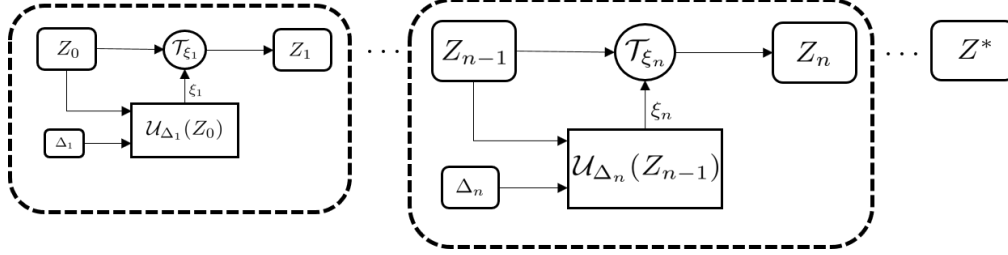

Figure 6: Pipeline of PDBOO.

Figure 6 shows the pipeline of our algorithm. With the schedule of perturbation bound  $\{\Delta_n\}$ , the ambiguity set  $\mathcal{U}_{\Delta_n}(Z_{n-1})$  can be defined by previous  $Z_{n-1}$ . For each step, (distributional) perturbation  $\xi_n$  is sampled from  $\mathcal{U}_{\Delta_n}(Z_{n-1})$  by the symmetric Dirichlet distribution and then PDBOO  $\mathcal{T}_{\xi_n}$  can be performed.

## C Implementation details

Except for each own hyperparameter, our algorithms and DLTV shares the same hyperparameter and network architecture with QR-DQN [10] for a fair comparison. Also, we set up p-DLTV by only multiplying a gaussian noise  $\mathcal{N}(0, 1)$  to the coefficient of DLTV. We do not combine any additional improvements of Rainbow such as double Q-learning, dueling network, prioritized replay, and  $n$ -step update. Experiments on LunarLander-v2 and Atari games were performed with 3 random seeds. The training process is 0-2% slower than QR-DQN due to the sampling  $\xi$  and reweighting procedures.

### C.1 N-Chain

For hyperparameter settings, we initialize all agents with a random policy for 500 steps and then train by 20K steps with 10 random seeds.  $\epsilon$ -greedy policy which is only executed on QR-DQN annealed linearly from 1 to 0.01 over the first 2500 steps. We used  $c = 50$  which was implemented in Mavrin et al. [18]. Although this  $c$  may not be optimal in a given environment, noted that its perturb variant, p-DLTV, learns successfully in the same settings. The batch size was 64 and the discount factor was  $\gamma = 0.9$ . We update the network every 1 step and the number of steps to update targets was 25 steps. The ground truth of return distribution at state  $s_0$  and  $s_4$  are computed as  $\gamma^2 \mathcal{N}(10, 0.1^2)$  and  $\gamma^2 (\frac{1}{2} \mathcal{N}(5, 0.1^2) + \frac{1}{2} \mathcal{N}(13, 0.1^2))$ , respectively.

### C.2 LunarLander-v2

The hyperparameters of QR-DQN were followed by the settings reported in Raffin et al. [23] for a fair comparison. Our experiments used 2 layers of MLP with 256 hidden units. We used the experience replay with batch size 128 and the buffer size  $1 \times 10^5$ . The number of quantiles  $N$  was 170 and  $\gamma = 0.995$ . As a stochastic gradient optimizer, we adopt Adam with a learning rate  $1.5 \times 10^{-3}$  with a linear decaying schedule.  $\epsilon$ -greedy schedule was only performed on QR-DQN. For the rest, we used  $\Delta = 5 \times 10^4$  and the best value of  $c = 0.05$  was chosen from  $[50, 5, 0.5, 0.05]$  where p-DLTV succeeded to learn while DLTV failed in all cases. We evaluated each algorithm for every 10K training steps by averaging 5 episodes.

### 556 C.3 Atari games

557 For a fair comparison, our hyperparameter setting is aligned with Dabney et al. [10]. The number  
 558 of quantile fraction  $N$  is 200. We set  $\gamma = 0.99$  and  $c = 50$  which refers to Mavrin et al. [18] and  
 559  $\Delta = 1 \times 10^6$ . We use  $\epsilon$ -greedy with threshold  $\epsilon = 0.01$  at training stage and  $\epsilon = 0.001$  at test stage.

### 560 C.4 Pseudocode of p-DLTV

---

#### Algorithm 2 Perturbed DLTV (p-DLTV)

---

**Input:** transition  $(s, a, r, s')$ , discount  $\gamma \in [0, 1)$   
 $Q(s', a') = \frac{1}{N} \sum_j \theta_j(s', a')$   
 # Randomize the coefficient  
 $c_t \sim c \mathcal{N}(0, \frac{\ln t}{t})$   
 $a^* \leftarrow \operatorname{argmax}_{a'} (Q(s', a') + c_t \sqrt{\sigma_+^2(s', a')})$   
 $\mathcal{T}\theta_j \leftarrow r + \gamma \theta_j(s', a^*), \quad \forall j$   
**Output:**  $\sum_{i=1}^N \mathbb{E}_j [\rho_{\tau_i}^\kappa(\mathcal{T}\theta_j - \theta_i(s, a))]$

---

## 561 D Further experimental results & Discussion

### 562 D.1 N-Chain

| Total Count | (8,10)       | (7,11)       | (6,12)       | (5,13)       | (4,14)       | (3,15)       | (2,16)       | (1,17)       |
|-------------|--------------|--------------|--------------|--------------|--------------|--------------|--------------|--------------|
| QR-DQN      | 12293        | 11381        | 11827        | 12108        | 10041        | 11419        | 9696         | 11619        |
| DLTV        | 9997         | 9172         | 9646         | 9251         | 7941         | 6964         | 7896         | 7257         |
| p-DLTV      | 14344        | 14497        | 13769        | <b>15507</b> | 14469        | <b>14034</b> | 14068        | 13404        |
| PQR         | <b>14546</b> | <b>15018</b> | <b>14693</b> | 15142        | <b>15361</b> | 13859        | <b>14602</b> | <b>14354</b> |

Table 2: Total counts of performing true optimal action with 4 seeds.

563 To explore the effect of intrinsic uncertainty, we run multiple experiments with various reward  
 564 settings for the rightmost state as keeping their mean at 9. As the distance between two Gaussians  
 565 was increased, the performance of DLTV decrease gradually, while other algorithms show consistent  
 566 results. The result implies the interference of fixedness is proportional to the magnitude of the  
 567 intrinsic uncertainty and the randomized criterion is effective in escaping from the issue.

### 568 D.2 LunarLander-v2

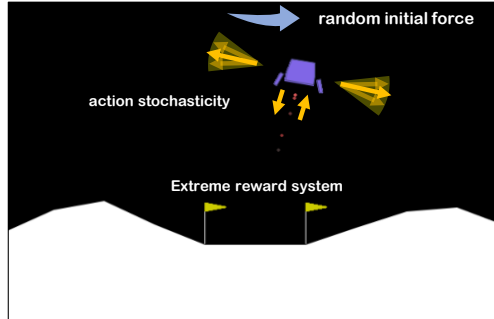

Figure 7: Three main environmental factors causing high intrinsic uncertainty on LunarLander-v2

569 To verify the effectiveness of the proposed algorithm in the complex environment with **high intrinsic**  
 570 **uncertainty**, we conduct the experiment on LunarLander-v2. We have focused on three main factors  
 571 that increase the intrinsic uncertainty from the structural design of LunarLander environment:

- **Random initial force:** The lander starts at the top center with an random initial force.
- **Action stochasticity:** The noise of engines causes different transitions with same action.
- **Extreme reward system:** If the lander crashes, it receives -100 points. If the lander comes to rest, it receives +100 points.

Therefore, several returns with a fixed policy have a high variance. As previously discussed about the fixedness from N-Chain environment, we can demonstrate that randomized approaches, PQR and p-DLTV, outperform other baselines in LunarLander-v2.

### D.3 Atari games

We test our algorithm under 30 no-op settings to align with previous works. We compare our baseline results with results from the DQN Zoo framework [22], which provides the full benchmark results on 57 Atari games at 50M and 200M frames. We report the average of the best scores over 5 seeds for each baseline algorithms up to 50M frames.

However, recent studies tried to follow the setting proposed by Machado et al. [17] for reproducibility, where they recommended using sticky actions. Hence, we provide all human normalized scores results across 55 Atari games including previous report of Yang et al. [30], Dopamine and DQN Zoo framework to help the follow-up researchers as a reference. We exclude Defender and Surround which is not reported on Yang et al. [30] because of reliability issues in the Dopamine framework. Since we conducted experiments on a deterministic setting, we believe that the performance gain of PQR with additional environmental stochasticity will increase.

For the expected concerns about the comparison with DLTV, we address some technical issues to correct misconceptions of their performance. Before we reproduce the empirical results of DLTV, Mavrin et al. [18] did not report each raw scores of Atari games, but only the relative performance with cumulative rewards comparing with QR-DQN. While DLTV was reported to have a cumulative reward 4.8 times greater than QR-DQN, such gain mainly comes from VENTURE which is evaluated as 22,700% from their metric (i.e., 463% performance gain solely). From their training curves, however, the approximate raw score of VENTURE was 900 which is lower than our score of 993.3. So, the report with cumulative rewards causes a misconception that can be overestimated where the human-normalized score is commonly used for evaluation metrics. Due to the absence of public results, DLTV were inevitably excluded from the comparison with human-normalized score for reliability.

|                       | Mean  | Median |
|-----------------------|-------|--------|
| DQN-dopamine(50M)     | 401%  | 51%    |
| DQN-zoo(50M)          | 314%  | 55%    |
| DQN-zoo(200M)         | 804%  | 84%    |
| DQN(200M)             | 221%  | 79%    |
| QR-DQN-dopamine(50M)  | 562%  | 93%    |
| QR-DQN-zoo(50M)       | 559%  | 118%   |
| QR-DQN-zoo(200M)      | 1714% | 174%   |
| QR-DQN(200M)          | 902%  | 193%   |
| IQN-dopamine(50M)     | 940%  | 124%   |
| IQN-zoo(50M)          | 902%  | 131%   |
| IQN-zoo(200M)         | 2070% | 229%   |
| IQN(200M)             | 1112% | 218%   |
| RAINBOW-dopamine(50M) | 965%  | 123%   |
| RAINBOW-zoo(50M)      | 1160% | 154%   |
| RAINBOW-zoo(200M)     | 2115% | 246%   |
| RAINBOW(200M)         | 1213% | 230%   |
| PQR(50M)              | 1121% | 124%   |

Table 3: Mean and median of best scores across 55 Atari games on 50M frames, measured as percentages of human baseline [2, 22, 30]

Table 3 provides the mean and median human normalized scores across 55 Atari games. Due to the high computational cost, our algorithm was evaluated on 50M frames to provide results over as many environments as possible. It is observed that PQR shows better performance in terms of both mean and median metrics than QR-DQN. Since our method is based on QR-DQN, we expect that PDBOO

606 can be combined with IQN [9] or techniques in Rainbow [13] as an efficient exploration method, and  
607 the performance can be further improved.

| GAMES            | RANDOM   | HUMAN   | DQN(50M) | QR-DQN(50M) | IQN(50M) | RAINBOW(50M) | PQR(50M)        |
|------------------|----------|---------|----------|-------------|----------|--------------|-----------------|
| Alien            | 227.8    | 7127.7  | 1541.5   | 1645.7      | 1769.2   | 4356.9       | <b>2455.8</b>   |
| Amidar           | 5.8      | 1719.5  | 324.2    | 683.4       | 799.2    | 2549.2       | <b>938.4</b>    |
| Assault          | 222.4    | 742.0   | 2387.8   | 11684.2     | 15152.4  | 9737.0       | 10759.2         |
| Asterix          | 210.0    | 8503.3  | 5249.5   | 18373.4     | 32598.2  | 33378.6      | 10490.5         |
| Asteroids        | 719.1    | 47388.7 | 1106.3   | 1503.9      | 1972.6   | 1825.4       | 1662.0          |
| Atlantis         | 12850.0  | 29028.1 | 283392.2 | 937275.0    | 865360.0 | 941740.0     | 897640.0        |
| BankHeist        | 14.2     | 753.1   | 389.0    | 1223.9      | 1266.8   | 1081.7       | 1038.8          |
| BattleZone       | 2360.0   | 37187.5 | 19092.4  | 26325.0     | 30253.9  | 35467.1      | 28470.5         |
| BeamRider        | 363.9    | 16926.5 | 7133.1   | 12912.0     | 19251.4  | 15421.9      | 10224.9         |
| Berzerk          | 123.7    | 2630.4  | 577.4    | 826.5       | 918.9    | 2061.6       | <b>137873.1</b> |
| Bowling          | 23.1     | 160.7   | 34.4     | 45.4        | 41.5     | 54.7         | <b>86.9</b>     |
| Boxing           | 0.1      | 12.1    | 87.2     | 99.6        | 99.2     | 99.8         | 97.1            |
| Breakout         | 1.7      | 30.5    | 316.8    | 426.5       | 468.0    | 335.3        | 380.3           |
| Centipede        | 2090.9   | 12017.0 | 4935.7   | 7124.0      | 7008.3   | 5691.4       | <b>7291.2</b>   |
| ChopperCommand   | 811.0    | 7387.8  | 974.2    | 1187.8      | 1549.0   | 5525.1       | 1300.0          |
| CrazyClimber     | 10780.5  | 35829.4 | 96939.0  | 93499.1     | 127156.5 | 160757.7     | 84390.9         |
| DemonAttack      | 152.1    | 1971.0  | 8325.6   | 106401.8    | 110773.1 | 85776.5      | 73794.0         |
| DoubleDunk       | -18.6    | -16.4   | -15.7    | -10.5       | -12.1    | -0.3         | <b>-7.5</b>     |
| Enduro           | 0.0      | 860.5   | 750.6    | 2105.7      | 2280.6   | 2318.3       | <b>2341.2</b>   |
| FishingDerby     | -91.7    | -38.7   | 8.2      | 25.7        | 23.4     | 35.5         | <b>31.7</b>     |
| Freeway          | 0.0      | 29.6    | 24.4     | 33.3        | 33.7     | 34.0         | <b>34.0</b>     |
| Frostbite        | 65.2     | 4334.7  | 408.2    | 3859.2      | 5650.8   | 9672.6       | 4148.2          |
| Gopher           | 257.6    | 2412.5  | 3439.4   | 6561.9      | 26768.9  | 32081.3      | <b>47054.5</b>  |
| Gravitar         | 173.0    | 3351.4  | 180.9    | 548.1       | 470.2    | 2236.8       | <b>635.8</b>    |
| Hero             | 1027.0   | 30826.4 | 9948.3   | 9909.8      | 12491.1  | 38017.9      | <b>12579.2</b>  |
| IceHockey        | -11.2    | 0.9     | -11.4    | -2.1        | -4.2     | 1.9          | <b>-1.4</b>     |
| Jamesbond        | 29.0     | 302.8   | 486.4    | 1163.8      | 1058.0   | 14415.5      | <b>2121.8</b>   |
| Kangaroo         | 52.0     | 3035.0  | 6720.7   | 14558.2     | 14256.0  | 14383.6      | <b>14617.1</b>  |
| Krull            | 1598.0   | 2665.5  | 7130.5   | 9612.5      | 9616.7   | 8328.5       | <b>9746.1</b>   |
| KungFuMaster     | 258.5    | 22736.3 | 21330.9  | 27764.3     | 39450.1  | 30506.9      | <b>43258.6</b>  |
| MontezumaRevenge | 0.0      | 4753.3  | 0.3      | 0.0         | 0.2      | 80.0         | 0.0             |
| MsPacman         | 307.3    | 6951.6  | 2362.9   | 2877.5      | 2737.4   | 3703.4       | <b>2928.9</b>   |
| NameThisGame     | 2292.3   | 8049.0  | 6328.0   | 11843.3     | 11582.2  | 11341.5      | 10298.2         |
| Phoenix          | 761.4    | 7242.6  | 10153.6  | 35128.6     | 29138.9  | 49138.8      | 20453.8         |
| Pitfall          | -229.4   | 6463.7  | -9.5     | 0.0         | 0.0      | 0.0          | <b>0.0</b>      |
| Pong             | -20.7    | 14.6    | 18.7     | 20.9        | 20.9     | 21.0         | <b>21.0</b>     |
| PrivateEye       | 24.9     | 69571.3 | 266.6    | 100.0       | 100.0    | 160.0        | <b>372.4</b>    |
| Qbert            | 163.9    | 13455.0 | 5567.9   | 12808.4     | 15101.8  | 24484.9      | <b>15267.4</b>  |
| Riverraid        | 1338.5   | 17118.0 | 6782.8   | 9721.9      | 13555.9  | 17522.9      | 11175.3         |
| RoadRunner       | 11.5     | 7845.0  | 29137.5  | 54276.3     | 53850.9  | 52222.6      | 50854.7         |
| Robotank         | 2.2      | 11.9    | 31.4     | 54.5        | 53.8     | 64.5         | <b>60.3</b>     |
| Seaquest         | 68.4     | 42054.7 | 2525.8   | 7608.2      | 17085.6  | 3048.9       | <b>19652.5</b>  |
| Skiing           | -17098.1 | -4336.9 | -13930.8 | -14589.7    | -19191.1 | -15232.3     | <b>-9299.3</b>  |
| Solaris          | 1236.3   | 12326.7 | 2031.5   | 1857.3      | 1301.5   | 2522.6       | <b>2640.0</b>   |
| SpaceInvaders    | 148.0    | 1668.7  | 1179.1   | 1753.2      | 2906.7   | 2715.3       | 1749.4          |
| StarGunner       | 664.0    | 10250.0 | 24532.5  | 63717.3     | 78503.4  | 107177.8     | 62920.6         |
| Tennis           | -23.8    | -8.3    | -0.9     | 0.0         | 0.0      | 0.0          | -1.0            |
| TimePilot        | 3568.0   | 5229.2  | 2091.8   | 6266.8      | 6379.1   | 12082.1      | <b>6506.4</b>   |
| Tutankham        | 11.4     | 167.6   | 138.7    | 210.2       | 204.4    | 194.3        | <b>231.3</b>    |
| UpNDown          | 533.4    | 11693.2 | 6724.5   | 27311.3     | 35797.6  | 65174.2      | <b>36008.1</b>  |
| Venture          | 0.0      | 1187.5  | 53.3     | 12.5        | 17.4     | 1.1          | <b>993.3</b>    |
| VideoPinball     | 16256.9  | 17667.9 | 140528.4 | 104405.8    | 341767.5 | 465636.5     | <b>465578.3</b> |
| WizardOfWor      | 563.5    | 4756.5  | 3459.9   | 14370.2     | 10612.1  | 12056.1      | 6132.8          |
| YarsRevenge      | 3092.9   | 54576.9 | 16433.7  | 21641.4     | 21645.0  | 67893.3      | <b>27674.4</b>  |
| Zaxxon           | 32.5     | 9173.3  | 3244.9   | 9172.1      | 8205.2   | 22045.8      | <b>10806.6</b>  |

Table 4: Raw scores across all 55 games, starting with 30 no-op actions. We report the best scores for DQN, QR-DQN, IQN and Rainbow on 50M frames, averaged by 5 seeds. Reference values were provided by DQN Zoo framework [22]. **Bold** are wins against DQN, QR-DQN and IQN, and **Blue Bold** are wins over Rainbow.

| GAMES            | RANDOM   | HUMAN   | DQN(50M) | QR-DQN(50M) | IQN(50M) | RAINBOW(50M) | PQR(50M) |
|------------------|----------|---------|----------|-------------|----------|--------------|----------|
| Alien            | 227.8    | 7127.7  | 1688.1   | 2754.2      | 4016.3   | 2076.2       | 2455.8   |
| Amidar           | 5.8      | 1719.5  | 888.2    | 841.6       | 1642.8   | 1669.6       | 938.4    |
| Assault          | 222.4    | 742     | 1615.9   | 2233.1      | 4305.6   | 2535.9       | 10759.2  |
| Asterix          | 210      | 8503.3  | 3326.1   | 3540.1      | 7038.4   | 5862.3       | 10490.5  |
| Asteroids        | 719.1    | 47388.7 | 828.2    | 1333.4      | 1336.3   | 1345.1       | 1662.0   |
| Atlantis         | 12850.0  | 29028.1 | 388466.7 | 879022.0    | 897558.0 | 870896.0     | 897640.0 |
| BankHeist        | 14.2     | 753.1   | 720.2    | 964.1       | 1082.8   | 1104.9       | 1038.8   |
| BattleZone       | 2360.0   | 37187.5 | 15110.3  | 25845.6     | 29959.7  | 32862.1      | 28470.5  |
| BeamRider        | 343.9    | 16926.5 | 4771.3   | 7143.0      | 7113.7   | 6331.9       | 10224.9  |
| Berzerk          | 123.7    | 2630.4  | 529.2    | 603.2       | 627.3    | 697.8        | 137873.1 |
| Bowling          | 23.1     | 160.7   | 38.5     | 55.3        | 33.6     | 55.0         | 86.9     |
| Boxing           | 0.1      | 12.1    | 80.0     | 96.6        | 97.8     | 96.3         | 97.1     |
| Breakout         | 1.7      | 30.5    | 113.5    | 40.7        | 164.4    | 69.8         | 380.3    |
| Centipede        | 2090.9   | 12017.0 | 3403.7   | 3562.5      | 3746.1   | 5087.6       | 7291.2   |
| ChopperCommand   | 811      | 7387.8  | 1615.3   | 1600.3      | 6654.1   | 5982.0       | 1044.0   |
| CrazyClimber     | 10780.5  | 35829.4 | 111493.8 | 108493.9    | 131645.8 | 135786.1     | 84390.9  |
| DemonAttack      | 152.1    | 1971.0  | 4396.7   | 3182.6      | 7715.5   | 6346.4       | 73794.0  |
| DoubleDunk       | -18.6    | -16.4   | -16.7    | 7.4         | 20.2     | 17.4         | -7.5     |
| Enduro           | 0        | 860.5   | 799.5    | 2062.5      | 2268.1   | 2255.6       | 2341.2   |
| FishingDerby     | -91.7    | -38.7   | 12.3     | 48.4        | 41.9     | 37.6         | 31.7     |
| Freeway          | 0        | 29.6    | 25.8     | 33.5        | 33.5     | 33.2         | 34.0     |
| Frostbite        | 65.2     | 4334.7  | 760.2    | 8022.8      | 7824.9   | 5697.2       | 4148.2   |
| Gopher           | 257.6    | 2412.5  | 3495.8   | 3917.1      | 11192.6  | 7102.1       | 47054.5  |
| Gravitar         | 173.0    | 3351.4  | 250.7    | 821.3       | 1083.5   | 926.2        | 635.8    |
| Hero             | 1027     | 30826.4 | 12316.4  | 14980.0     | 18754.0  | 31254.8      | 12579.2  |
| IceHockey        | -11.2    | 0.9     | -6.7     | -4.5        | 0.0      | 2.3          | -1.4     |
| Jamesbond        | 29.0     | 302.8   | 500.0    | 802.3       | 1118.8   | 656.7        | 2121.8   |
| Kangaroo         | 52.0     | 3035.0  | 6768.2   | 4727.3      | 11385.4  | 13133.1      | 14617.1  |
| Krull            | 1598     | 2665.5  | 6181.1   | 8073.9      | 8661.7   | 6292.5       | 9746.1   |
| KungFuMaster     | 258.5    | 22736.3 | 20418.8  | 20988.3     | 33099.9  | 26707.0      | 43258.6  |
| MontezumaRevenge | 0.0      | 4753.3  | 2.6      | 300.5       | 0.7      | 501.2        | 0.0      |
| MsPacman         | 307.3    | 6951.6  | 2727.2   | 3313.9      | 4714.4   | 3406.4       | 2928.9   |
| NameThisGame     | 2292.3   | 8049.0  | 5697.3   | 7307.9      | 9432.8   | 9389.5       | 10298.2  |
| Phoenix          | 761.4    | 7245.6  | 5833.7   | 4641.1      | 5147.2   | 8272.9       | 20453.8  |
| Pitfall          | -229.4   | 6463.7  | -16.8    | -3.4        | -0.4     | 0            | 0.0      |
| Pong             | -20.7    | 14.6    | 13.2     | 19.2        | 19.9     | 19.4         | 21.0     |
| PrivateEye       | 24.9     | 69571.3 | 1884.6   | 680.7       | 1287.3   | 4298.8       | 372.4    |
| Qbert            | 163.9    | 13455.0 | 8216.2   | 17228.0     | 15045.5  | 17121.4      | 15267.4  |
| Riverraid        | 1338.5   | 17118.0 | 9077.8   | 13389.4     | 14868.6  | 15748.9      | 11175.3  |
| RoadRunner       | 11.5     | 7845.0  | 39703.1  | 44619.2     | 50534.1  | 51442.4      | 50854.7  |
| Robotank         | 2.2      | 11.9    | 25.8     | 53.6        | 65.9     | 63.6         | 60.3     |
| Seaquest         | 68.4     | 42054.7 | 1585.9   | 4667.9      | 20081.3  | 3916.2       | 19652.5  |
| Skiing           | -17098.1 | -4336.9 | -17038.2 | -14401.6    | -13755.6 | -17960.1     | -9299.3  |
| Solaris          | 1236.3   | 12326.7 | 2029.5   | 2361.7      | 2234.5   | 2922.2       | 2640.0   |
| SpaceInvaders    | 148.0    | 1668.7  | 1361.1   | 940.2       | 3115.0   | 1908.0       | 1749.4   |
| StarGunner       | 664.0    | 10250.0 | 1676.5   | 23593.3     | 60090.0  | 39456.3      | 62920.6  |
| Tennis           | -23.8    | -9.3    | -0.1     | 19.2        | 3.5      | 0.0          | -1.0     |
| TimePilot        | 3568.0   | 5229.2  | 3200.9   | 6622.8      | 9820.6   | 9324.4       | 6506.4   |
| Tutankham        | 11.4     | 167.6   | 138.8    | 209.9       | 250.4    | 252.2        | 231.3    |
| UpNDown          | 533.4    | 11693.2 | 10405.6  | 29890.1     | 44327.6  | 18790.7      | 36008.1  |
| Venture          | 0        | 1187.5  | 50.8     | 1099.6      | 1134.5   | 1488.9       | 993.3    |
| VideoPinball     | 16256.9  | 17667.9 | 216042.7 | 250650.0    | 486111.5 | 536364.4     | 465578.3 |
| WizardOfWor      | 563.5    | 4756.5  | 2664.9   | 2841.8      | 6791.4   | 7562.7       | 6132.8   |
| YarsRevenge      | 3092.9   | 54576.9 | 20375.7  | 66055.9     | 57960.3  | 31864.4      | 27674.4  |
| Zaxxon           | 32.5     | 9173.3  | 1928.6   | 8177.2      | 12048.6  | 14117.5      | 10806.6  |

Table 5: Raw scores across all 55 games. We report the best scores for DQN, QR-DQN, IQN, and Rainbow on 50M frames, averaged by 5 seeds. Reference values were provided by Dopamine framework [2].



| GAMES            | RANDOM   | HUMAN   | DQN(200M) | QR-DQN(200M) | IQN(200M) | PQR(50M) |
|------------------|----------|---------|-----------|--------------|-----------|----------|
| Alien            | 227.8    | 7127.7  | 1620.0    | 4871.0       | 7022.0    | 2455.8   |
| Amidar           | 5.8      | 1719.5  | 978.0     | 1641.0       | 2946.0    | 938.4    |
| Assault          | 222.4    | 742.0   | 4280.4    | 22012.0      | 29091.0   | 10759.2  |
| Asterix          | 210.0    | 8503.3  | 4359.0    | 261025.0     | 342016.0  | 10490.5  |
| Asteroids        | 719.1    | 47388.7 | 1364.5    | 4226.0       | 2898.0    | 1662.0   |
| Atlantis         | 12850.0  | 29028.1 | 279987.0  | 971850.0     | 978200.0  | 897640.0 |
| BankHeist        | 14.2     | 753.1   | 455.0     | 1249.0       | 1416.0    | 1038.8   |
| BattleZone       | 2360.0   | 37187.5 | 29900.0   | 39268.0      | 42244.0   | 28470.5  |
| BeamRider        | 363.9    | 16926.5 | 8627.5    | 34821.0      | 42776.0   | 10224.9  |
| Berzerk          | 123.7    | 2630.4  | 585.6     | 3117.0       | 1053.0    | 137873.1 |
| Bowling          | 23.1     | 160.7   | 50.4      | 77.2         | 86.5      | 86.9     |
| Boxing           | 0.1      | 12.1    | 88.0      | 99.9         | 99.8      | 97.1     |
| Breakout         | 1.7      | 30.5    | 385.5     | 742.0        | 734.0     | 380.3    |
| Centipede        | 2090.9   | 12017.0 | 4657.7    | 12447.0      | 11561.0   | 7291.2   |
| ChopperCommand   | 811.0    | 7387.8  | 6126.0    | 14667.0      | 16836.0   | 1044.0   |
| CrazyClimber     | 10780.5  | 35829.4 | 110763.0  | 161196.0     | 179082.0  | 84390.9  |
| DemonAttack      | 152.1    | 1971.0  | 12149.4   | 121551.0     | 128580.0  | 73794.0  |
| DoubleDunk       | -18.6    | -16.4   | -6.6      | 21.9         | 5.6       | -7.5     |
| Enduro           | 0.0      | 860.5   | 729.0     | 2355.0       | 2359.0    | 2341.2   |
| FishingDerby     | -91.7    | -38.7   | -4.9      | 39.0         | 33.8      | 31.7     |
| Freeway          | 0.0      | 29.6    | 30.8      | 34.0         | 34.0      | 34.0     |
| Frostbite        | 65.2     | 4334.7  | 797.4     | 4384.0       | 4324.0    | 4148.2   |
| Gopher           | 257.6    | 2412.5  | 8777.4    | 113585.0     | 118365.0  | 47054.5  |
| Gravitar         | 173.0    | 3351.4  | 473.0     | 995.0        | 911.0     | 635.8    |
| Hero             | 1027.0   | 30826.4 | 20437.8   | 21395.0      | 28386.0   | 12579.2  |
| IceHockey        | -11.2    | 0.9     | -1.9      | -1.7         | 0.2       | -1.4     |
| Jamesbond        | 29.0     | 302.8   | 768.5     | 4703.0       | 35108.0   | 2121.8   |
| Kangaroo         | 52.0     | 3035.0  | 7259.0    | 15356.0      | 15487.0   | 14617.1  |
| Krull            | 1598.0   | 2665.5  | 8422.3    | 11447.0      | 10707.0   | 9746.1   |
| KungFuMaster     | 258.5    | 22736.3 | 26059.0   | 76642.0      | 73512.0   | 43258.6  |
| MontezumaRevenge | 0.0      | 4753.3  | 0.0       | 0.0          | 0.0       | 0.0      |
| MsPacman         | 307.3    | 6951.6  | 3085.6    | 5821.0       | 6349.0    | 2928.9   |
| NameThisGame     | 2292.3   | 8049.0  | 8207.8    | 21890.0      | 22682.0   | 10298.2  |
| Phoenix          | 761.4    | 7242.6  | 8485.2    | 16585.0      | 56599.0   | 20453.8  |
| Pitfall          | -229.4   | 6463.7  | -286.1    | 0.0          | 0.0       | 0.0      |
| Pong             | -20.7    | 14.6    | 19.5      | 21.0         | 21.0      | 21.0     |
| PrivateEye       | 24.9     | 69571.3 | 146.7     | 350.0        | 200.0     | 372.4    |
| Qbert            | 163.9    | 13455.0 | 13117.3   | 572510.0     | 25750.0   | 15267.4  |
| Riverraid        | 1338.5   | 17118.0 | 7377.6    | 17571.0      | 17765.0   | 11175.3  |
| RoadRunner       | 11.5     | 7845.0  | 39544.0   | 64262.0      | 57900.0   | 50854.7  |
| Robotank         | 2.2      | 11.9    | 63.9      | 59.4         | 62.5      | 60.3     |
| Seaquest         | 68.4     | 42054.7 | 5860.6    | 8268.0       | 30140.0   | 19652.5  |
| Skiing           | -17098.1 | -4336.9 | -13062.3  | -9324.0      | -9289.0   | -9299.3  |
| Solaris          | 1236.3   | 12326.7 | 3482.8    | 6740.0       | 8007.0    | 2640.0   |
| SpaceInvaders    | 148.0    | 1668.7  | 1692.3    | 20972.0      | 28888.0   | 1749.4   |
| StarGunner       | 664.0    | 10250.0 | 54282.0   | 77495.0      | 74677.0   | 60920.6  |
| Tennis           | -23.8    | -9.3    | 12.2      | 23.6         | 23.6      | -1.0     |
| TimePilot        | 3568.0   | 5229.2  | 4870.0    | 10345.0      | 12236.0   | 6506.4   |
| Tutankham        | 11.4     | 167.6   | 68.1      | 297.0        | 293.0     | 231.3    |
| UpNDown          | 533.4    | 11693.2 | 9989.9    | 71260.0      | 88148.0   | 36008.1  |
| Venture          | 0.0      | 1187.5  | 163.0     | 43.9         | 1318.0    | 993.3    |
| VideoPinball     | 16256.9  | 17667.9 | 196760.4  | 705662.0     | 698045.0  | 465578.3 |
| WizardOfWor      | 563.5    | 4756.5  | 2704.0    | 25061.0      | 31190.0   | 6132.8   |
| YarsRevenge      | 3092.9   | 54576.9 | 18098.9   | 26447.0      | 28379.0   | 2764.4   |
| Zaxxon           | 32.5     | 9173.3  | 5363.0    | 13113.0      | 21772.0   | 10806.6  |

Table 6: Raw scores across all 55 games, starting with 30 no-op actions. Note that PQR was evaluated on 50M frames. We report the published scores for DQN, QR-DQN, and IQN on 200M frames. Reference values from Yang et al. [30].
