# Supplementary material
Source: ML conference proceedings conference paper supplement (https://openreview.net/forum?id=-WXCYvc5E-P)
Supplement: supplementary_material [file attachment]

## 421 A Proof

### 422 A.1 Technical Lemma

423 Before proving our theoretical results, we present two inequalities for supremum to clear the descrip-  
424 tion.

$$\begin{aligned}
425 \quad & 1. \sup_{x \in X} |f(x) + g(x)| \leq \sup_{x \in X} |f(x)| + \sup_{x \in X} |g(x)| \\
426 \quad & 2. \left| \sup_{x \in X} f(x) - \sup_{x' \in X} g(x') \right| \leq \sup_{x, x' \in X} |f(x) - g(x')|
\end{aligned}$$

427 *Proof of 1.* Since  $|f(x) + g(x)| \leq |f(x)| + |g(x)|$  holds for all  $x \in X$ ,

$$\begin{aligned}
& \sup_{x \in X} |f(x) + g(x)| \leq \sup_{x \in X} (|f(x)| + |g(x)|) \\
& \leq \sup_{x \in X} |f(x)| + \sup_{x \in X} |g(x)|
\end{aligned}$$

428 ■

429 *Proof of 2.* Since  $|\|a\| - \|b\|| \leq \|a - b\|$  for any norm  $\|\cdot\|$  and for a large enough  $M$ ,

$$\begin{aligned}
& \sup_{x, x' \in X} |f(x) - g(x')| \geq \sup_{x \in X} |f(x) - g(x)| \\
& = \sup_{x \in X} |(f(x) + M) - (g(x) + M)| \\
& \geq \left| \sup_{x \in X} (f(x) + M) - \sup_{x \in X} (g(x) + M) \right| \\
& = \left| \sup_{x \in X} f(x) - \sup_{x' \in X} g(x') \right|
\end{aligned}$$

430 ■

### 431 A.2 Proof of Theorem A.3

432 **Theorem A.3.** If  $\xi_t$  converges to 1 uniformly on  $\Omega$ , then  $\mathbb{E}\mathcal{T}_{\xi_t}$  also converges to  $\mathbb{E}\mathcal{T}$  uniformly on  
433  $\mathcal{Z}$  for all  $s \in \mathcal{S}$  and  $a \in \mathcal{A}$ .

434 *Proof.* Recall that  $\mathcal{Z} = \left\{ Z : \mathcal{S} \times \mathcal{A} \rightarrow \mathcal{P}(\mathbb{R}) \mid \mathbb{E}[|Z(s, a)|] \leq V_{\max}, \forall (s, a) \right\}$ . Then for any  $Z \in \mathcal{Z}$   
435 and  $\xi \in \Xi$ ,

$$\mathbb{E}[|\mathcal{T}_{\xi} Z|] \leq R_{\max} + \gamma \frac{R_{\max}}{1 - \gamma} = \frac{R_{\max}}{1 - \gamma} = V_{\max}.$$

436 which implies PDBOO is closed in  $\mathcal{Z}$ , i.e.  $\mathcal{T}_{\xi} Z \in \mathcal{Z}$  for all  $\xi \in \Xi$ . Hence, for any sequence  $\xi_t$ ,  
437  $Z^{(n)} = \mathcal{T}_{\xi_{n:1}} Z \in \mathcal{Z}$  for any  $n \geq 0$ .

438 Since  $\xi_t$  converges to 1 uniformly on  $\Omega$ , there exists  $T$  such that for any  $t > T$ ,

$$\sup_{w \in \Omega} |\xi_t(w) - 1| \leq \epsilon.$$

439 For any  $Z \in \mathcal{Z}$ ,  $s \in \mathcal{S}$ ,  $a \in \mathcal{A}$ , and  $t > T$ , by using Hölder's inequality,

$$\begin{aligned}
& \sup_{Z \in \mathcal{Z}} \sup_{s, a} |\mathbb{E}_{\xi_t}[Z(s, a)] - \mathbb{E}[Z(s, a)]| = \sup_{Z \in \mathcal{Z}} \sup_{s, a} \left| \int_{w \in \Omega} (1 - \xi_t(w)) Z(s, a, w) \mathbb{P}(w) dw \right| \\
& \leq \sup_{w \in \Omega} |\xi_t(w) - 1| \sup_{Z \in \mathcal{Z}} \sup_{s, a} \left| \int_{w \in \Omega} |Z(s, a, w)| \mathbb{P}(w) dw \right| \\
& \leq \epsilon V_{\max}
\end{aligned}$$

440 which implies that  $\mathbb{E}_{\xi_t}$  converges to  $\mathbb{E}$  uniformly on  $\mathcal{Z}$  for all  $s, a$ .

441 By using A.1, we can get the desired result.

$$\begin{aligned}
& \sup_{Z \in \mathcal{Z}} \sup_{s, a} |\mathbb{E}[\mathcal{T}_{\xi_t} Z(s, a)] - \mathbb{E}[\mathcal{T} Z(s, a)]| \\
& \leq \sup_{Z \in \mathcal{Z}} \sup_{s, a} |\mathbb{E}[\mathcal{T}_{\xi_t} Z(s, a)] - \mathbb{E}_{\xi_t}[\mathcal{T}_{\xi_t} Z(s, a)]| + \sup_{Z \in \mathcal{Z}} \sup_{s, a} |\mathbb{E}_{\xi_t}[\mathcal{T}_{\xi_t} Z(s, a)] - \mathbb{E}[\mathcal{T} Z(s, a)]| \\
& \leq \epsilon V_{\max} + \gamma \sup_{Z \in \mathcal{Z}} \sup_{s, a} \mathbb{E}_{s'} \left[ \left| \sup_{a'} \mathbb{E}_{\xi_t}[Z(s', a')] - \sup_{a''} \mathbb{E}[Z(s', a'')] \right| \right] \\
& \leq \epsilon V_{\max} + \gamma \sup_{Z \in \mathcal{Z}} \sup_{s', a'} |\mathbb{E}_{\xi_t}[Z(s', a')] - \mathbb{E}[Z(s', a')]| \\
& \leq \epsilon V_{\max} + \gamma \epsilon V_{\max} \\
& = (1 + \gamma) \epsilon V_{\max}.
\end{aligned}$$

442

■

### 443 A.3 Proof of Theorem 3.3

444 **Theorem 3.3.** Let  $\xi_n$  be sampled from  $\bar{\mathcal{U}}_{\Delta_n}(Z^{(n-1)})$  for every iteration. If Assumption 3.2 holds,  
 445 then the expectation of any composition of operators  $\mathbb{E}\mathcal{T}_{\xi_{n:1}}$  converges, i.e.

$$\mathbb{E}\mathcal{T}_{\xi_{n:1}}[Z] \rightarrow \mathbb{E}[Z^*]$$

446 Moreover, the following bound holds,

$$\sup_{s, a} \left| \mathbb{E}[Z^{(n)}(s, a)] - \mathbb{E}[Z^*(s, a)] \right| \leq \sum_{k=n}^{\infty} \left( 2\gamma^{k-1} V_{\max} + 2 \sum_{i=1}^k \gamma^i (\Delta_{k+2-i} + \Delta_{k+1-i}) \right).$$

447 *Proof.* We denote  $a_i^*(\xi_n) = \operatorname{argmax}_{a'} \mathbb{E}_{\xi_n}[Z_i^{(n-1)}(s', a')]$  as the greedy action of  $Z_i^{(n-1)}$  under  
 448 perturbation  $\xi_n$ . Also, we denote  $\sup_{s, a} |\cdot|$  which is the supremum norm over  $s$  and  $a$  as  $\|\cdot\|_{sa}$ .

449 Before we start from the term  $\|\mathbb{E}[Z^{(k+1)}] - \mathbb{E}[Z^{(k)}]\|_{sa}$ , for a given  $(s, a)$ ,

$$\begin{aligned}
& \left| \mathbb{E}[Z^{(k+1)}(s, a)] - \mathbb{E}[Z^{(k)}(s, a)] \right| \\
& \leq \gamma \sup_{s'} \left| \mathbb{E}[Z^{(k)}(s', a^*(\xi_{k+1}))] - \mathbb{E}[Z^{(k-1)}(s', a^*(\xi_k))] \right| \\
& \leq \gamma \sup_{s'} \left( \left| \mathbb{E}[Z^{(k)}(s', a^*(\xi_{k+1}))] - \max_{a'} \mathbb{E}[Z^{(k)}(s', a')] \right| + \left| \max_{a'} \mathbb{E}[Z^{(k)}(s', a')] - \max_{a'} \mathbb{E}[Z^{(k-1)}(s', a')] \right| \right. \\
& \quad \left. + \left| \max_{a'} \mathbb{E}[Z^{(k-1)}(s', a')] - \mathbb{E}[Z^{(k-1)}(s', a^*(\xi_k))] \right| \right) \\
& \leq \gamma \sup_{s', a'} \left| \mathbb{E}[Z^{(k)}(s', a')] - \mathbb{E}[Z^{(k-1)}(s', a')] \right| + \gamma \sum_{i=k-1}^k \sup_{s'} \left| \mathbb{E}[Z^{(i)}(s', a^*(\xi_{i+1}))] - \max_{a'} \mathbb{E}[Z^{(i)}(s', a')] \right| \\
& \leq \gamma \left\| \mathbb{E}[Z^{(k)}] - \mathbb{E}[Z^{(k-1)}] \right\|_{sa} + \gamma \sum_{i=k-1}^k \left[ \sup_{s'} \left( \left| \mathbb{E}[Z^{(i)}(s', a^*(\xi_{i+1}))] - \mathbb{E}_{\xi_{i+1}}[Z^{(i)}(s', a^*(\xi_{i+1}))] \right| \right. \right. \\
& \quad \left. \left. + \left| \max_{a'} \mathbb{E}_{\xi_{i+1}}[Z^{(i)}(s', a')] - \max_{a''} \mathbb{E}[Z^{(i)}(s', a'')] \right| \right) \right] \\
& \leq \gamma \left\| \mathbb{E}[Z^{(k)}] - \mathbb{E}[Z^{(k-1)}] \right\|_{sa} + 2\gamma \sum_{i=k-1}^k \sup_{s', a'} \left( \left| \mathbb{E}[Z^{(i)}(s', a')] - \mathbb{E}_{\xi_{i+1}}[Z^{(i)}(s', a')] \right| \right) \\
& \leq \gamma \left\| \mathbb{E}[Z^{(k)}] - \mathbb{E}[Z^{(k-1)}] \right\|_{sa} + 2\gamma \sum_{i=k-1}^k \Delta_{i+1}
\end{aligned}$$

450 where we use A.1.1 in third and fifth line and A.1.2 in sixth line.

451 Taking a supremum over  $s$  and  $a$ , then for all  $k > 0$ ,

$$\begin{aligned}
& \left\| \mathbb{E}[Z^{(k+1)}] - \mathbb{E}[Z^{(k)}] \right\|_{sa} \\
& \leq \gamma \left\| \mathbb{E}[Z^{(k)}] - \mathbb{E}[Z^{(k-1)}] \right\|_{sa} + 2 \sum_{i=k-1}^k \gamma \Delta_{i+1} \\
& \leq \gamma^2 \left\| \mathbb{E}[Z^{(k-1)}] - \mathbb{E}[Z^{(k-2)}] \right\|_{sa} + 2 \sum_{i=k-2}^{k-1} \gamma^2 \Delta_{i+1} + 2 \sum_{i=k-1}^k \gamma \Delta_{i+1} \\
& \quad \vdots \\
& \leq \gamma^k \left\| \mathbb{E}[Z^{(1)}] - \mathbb{E}[Z] \right\|_{sa} + 2 \sum_{i=1}^k \gamma^i (\Delta_{k+2-i} + \Delta_{k+1-i}) \\
& \leq 2\gamma^k V_{\max} + 2 \sum_{i=1}^k \gamma^i (\Delta_{k+2-i} + \Delta_{k+1-i})
\end{aligned}$$

452 Since  $\sum_{i=1}^{\infty} \gamma^i = \frac{\gamma}{1-\gamma} < \infty$  and  $\sum_{i=1}^{\infty} \Delta_i < \infty$  by assumption, we have

$$\sum_{i=1}^k \gamma^i \Delta_{k+1-i} \rightarrow 0$$

453 which is resulted from the convergence of Cauchy product of two sequences  $\{\gamma^i\}$  and  $\{\Delta_i\}$ . Hence,  
454  $\{\mathbb{E}[Z^{(k)}]\}$  is a Cauchy sequence and therefore converges for every  $Z \in \mathcal{Z}$ .

455 Let  $\mathbb{E}[Z^*]$  be the limit point of the sequence  $\{\mathbb{E}[Z^{(n)}]\}$ . Then,

$$\begin{aligned}
\left\| \mathbb{E}[Z^*] - \mathbb{E}[Z^{(n)}] \right\|_{sa} &= \lim_{l \rightarrow \infty} \left\| \mathbb{E}[Z^{(n+l)}] - \mathbb{E}[Z^{(n)}] \right\|_{sa} \\
&\leq \sum_{k=n}^{\infty} \left\| \mathbb{E}[Z^{(k+1)}] - \mathbb{E}[Z^{(k)}] \right\|_{sa} \\
&= \sum_{k=n}^{\infty} \left( 2\gamma^k V_{\max} + 2 \sum_{i=1}^k \gamma^i (\Delta_{k+2-i} + \Delta_{k+1-i}) \right).
\end{aligned}$$

456 ■

#### 457 A.4 Proof of Theorem 3.4

458 **Theorem 3.4.** If  $\{\Delta_n\}$  follows the assumption in Theorem 3.3, then  $\mathbb{E}[Z^*]$  is the unique solution of  
459 Bellman optimality equation.

460 *Proof.* The proof follows by linearity of expectation. Denote the Q-value based operator as  $\bar{\mathcal{T}}$ . Note  
461 that  $\Delta_n$  converges to 0 with regularity of  $\mathcal{Z}$  implies that  $\xi_n$  converges to 1 uniformly on  $\Omega$ . By  
462 Theorem A.3, for a given  $\epsilon > 0$ , there exists a constant  $K = \max(K_1, K_2)$  such that for every  
463  $k \geq K_1$ ,

$$\sup_{Z \in \mathcal{Z}} \|\bar{\mathcal{T}}_{\xi_k} \mathbb{E}[Z] - \bar{\mathcal{T}} \mathbb{E}[Z]\|_{sa} \leq \frac{\epsilon}{2}.$$

464 Since  $\bar{\mathcal{T}}$  is continuous, for every  $k \geq K_2$ ,

$$\|\bar{\mathcal{T}} \mathbb{E}[Z^{(k)}] - \bar{\mathcal{T}} \mathbb{E}[Z^*]\|_{sa} \leq \frac{\epsilon}{2}.$$

Thus, it holds that

$$\begin{aligned}
\|\bar{\mathcal{T}}_{\xi_{k+1}} \mathbb{E}[Z^{(k)}] - \bar{\mathcal{T}} \mathbb{E}[Z^*]\|_{sa} &\leq \|\bar{\mathcal{T}}_{\xi_{k+1}} \mathbb{E}[Z^{(k)}] - \bar{\mathcal{T}} \mathbb{E}[Z^{(k)}]\|_{sa} + \|\bar{\mathcal{T}} \mathbb{E}[Z^{(k)}] - \bar{\mathcal{T}} \mathbb{E}[Z^*]\|_{sa} \\
&\leq \sup_{Z \in \mathcal{Z}} \|\bar{\mathcal{T}}_{\xi_{k+1}} \mathbb{E}[Z] - \bar{\mathcal{T}} \mathbb{E}[Z]\|_{sa} + \|\bar{\mathcal{T}} \mathbb{E}[Z^{(k)}] - \bar{\mathcal{T}} \mathbb{E}[Z^*]\|_{sa} \\
&\leq \frac{\epsilon}{2} + \frac{\epsilon}{2} \\
&= \epsilon.
\end{aligned}$$

Therefore, we have

$$\mathbb{E}[Z^*] = \lim_{k \rightarrow \infty} \mathbb{E}[Z^{(k)}] = \lim_{k \rightarrow \infty} \mathbb{E}[Z^{(k+1)}] = \lim_{k \rightarrow \infty} \mathbb{E}[\mathcal{T}_{\xi_{k+1}} Z^{(k)}] = \lim_{k \rightarrow \infty} \bar{\mathcal{T}}_{\xi_{k+1}} \mathbb{E}[Z^{(k)}] = \bar{\mathcal{T}} \mathbb{E}[Z^*]$$

Since the standard Bellman optimality operator has a unique solution, we derived the desired result. ■

## B Algorithm Pipeline and Illustrative Example

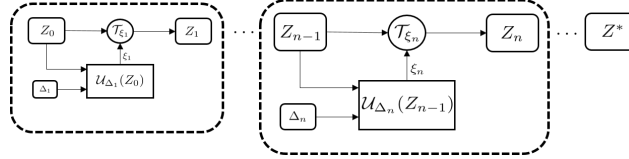

Figure 6: Pipeline of PDBOO.

Figure 6 shows the pipeline of our algorithm. With the schedule of perturbation bound  $\{\Delta_n\}$ , the ambiguity set  $\mathcal{U}_{\Delta_n}(Z_{n-1})$  can be defined by previous  $Z_{n-1}$ . For each step, (distributional) perturbation  $\xi_n$  is sampled from  $\mathcal{U}_{\Delta_n}(Z_{n-1})$  by the symmetric Dirichlet distribution and then PDBOO  $\mathcal{T}_{\xi_n}$  can be performed.

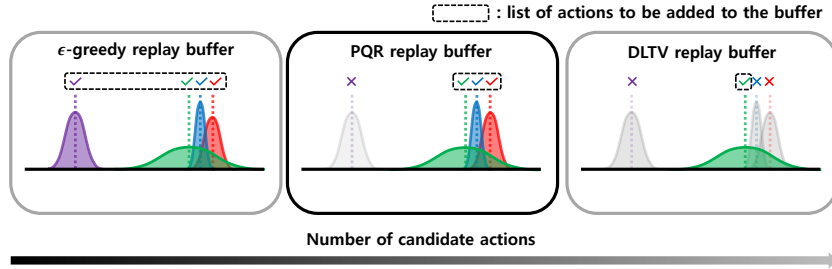

Figure 7: An illustrative example of proposed algorithm (PQR). Each distribution represents the empirical PDF of return. PQR benefits from excluding inferior actions and promoting unbiased selection with regards to high intrinsic uncertainty through randomized risk criterion.

## C Implementation details

Except for each own hyperparameter, our algorithms and DLTV shares the same hyperparameter and network architecture with QR-DQN [10] for a fair comparison. Also, we set up p-DLTV by only multiplying a gaussian noise  $\mathcal{N}(0, 1)$  to the coefficient of DLTV. We do not combine any additional improvements of Rainbow such as double Q-learning, dueling network, prioritized replay, and  $n$ -step update. Experiments on LunarLander-v2 and Atari games were performed with 3 random seeds. The training process is 0-2% slower than QR-DQN due to the sampling  $\xi$  and reweighting procedures.

## C.1 Hyperparameter Setting

We report the hyperparameters for each environments we used in our experiments.

- Batch size : 32 (Atari games), 64 (N-Chain), 128 (LunarLander-v2)
- Number of quantiles  $N$ : 170 (LunarLander-v2), 200 (N-Chain, Atari games)
- Step for  $n$ -step updates : 1
- Network optimizer : Adam
- $\beta$  : Grid search[**0.05**, 0.1, 0.5, 1]  $\times 1^N$
- $\kappa$  : 1
- Memory size :  $1 \times 10^5$  (LunarLander-v2),  $1 \times 10^6$  (Atari games)
- learning rate :  $5 \times 10^{-5}$  (N-Chain, Atari games),  $1.5 \times 10^{-3}$  (LunarLander-v2)
- Gamma : 0.9 (N-Chain), 0.99 (Atari games), 0.995 (LunarLander-v2)
- Update interval : 1 (N-Chain, LunarLander-v2), 4 (Atari games)
- Target update interval : 1 (LunarLander-v2), 25 (N-Chain),  $1 \times 10^4$  (Atari games)
- Start steps :  $5 \times 10^2$  (N-Chain),  $1 \times 10^4$  (LunarLander-v2),  $5 \times 10^4$  (Atari games)
- $\epsilon$  (train)/(test) : LinearAnnealer( $1 \rightarrow 1 \times 10^{-2}$ ) /  $1 \times 10^{-3}$
- $\epsilon$  decay steps :  $2.5 \times 10^3$  (N-Chain),  $1 \times 10^5$  (LunarLander-v2),  $2.5 \times 10^5$  (Atari games)
- Coefficient  $c$  : Grid search[**0.05** (LunarLander-v2), 0.5, 5, **50** (N-Chain, Atari games)]
- $\Delta_0$  :  $5 \times 10^2$  (N-Chain),  $5 \times 10^4$  (LunarLander-v2),  $1 \times 10^6$  (Atari games)

## C.2 N-Chain

We used  $c = 50$  which was implemented in Mavrin et al. [17]. Although this  $c$  may not be optimal in a given environment, noted that its perturb variant, p-DLTV, learns successfully in the same settings. The ground truth of return distribution at state  $s_0$  and  $s_4$  are computed as  $\gamma^2 \mathcal{N}(10, 0.1^2)$  and  $\gamma^2(\frac{1}{2}\mathcal{N}(5, 0.1^2) + \frac{1}{2}\mathcal{N}(13, 0.1^2))$ , respectively.

## C.3 LunarLander-v2

The hyperparameters of QR-DQN were followed by the settings reported in Raffin et al. [23] for a fair comparison. Our experiments used 2 layers of MLP with 256 hidden units. As a stochastic gradient optimizer, we adopt Adam with a learning rate  $1.5 \times 10^{-3}$  with a linear decaying schedule. For the rest, the best value of  $c = 0.05$  was chosen from [50, 5, 0.5, 0.05] where p-DLTV succeeded to learn while DLTV failed in all cases.

## C.4 Atari games

For a fair comparison, our hyperparameter setting is aligned with Dabney et al. [10].

## C.5 Pseudocode of p-DLTV and PQR

---

### Algorithm 1 Perturbed DLTV (p-DLTV)

---

**Input:** transition  $(s, a, r, s')$ , discount  $\gamma \in [0, 1]$   
 $Q(s', a') = \frac{1}{N} \sum_j \theta_j(s', a')$   
 # Randomize the coefficient  
 $c_t \sim c \mathcal{N}(0, \frac{\ln t}{t})$   
 $a^* \leftarrow \operatorname{argmax}_{a'} (Q(s', a') + c_t \sqrt{\sigma_+^2(s', a')})$   
 $\mathcal{T} \theta_j \leftarrow r + \gamma \theta_j(s', a^*), \quad \forall j$   
**Output:**  $\sum_{i=1}^N \mathbb{E}_j [\rho_{\tau_i}^\kappa (\mathcal{T} \theta_j - \theta_i(s, a))]$

---

---

**Algorithm 2** Perturbed QR-DQN (PQR)

---

**Input:**  $(s, a, r, s'), \gamma \in [0, 1)$ , timestep  $t > 0$ ,  $\epsilon > 0$ , concentration  $\beta$

Initialize  $\Delta_0 > 0$ .  
 $\Delta_t \leftarrow \Delta_0 t^{-(1+\epsilon)}$ .  
# Sample  $\xi \sim \tilde{U}_{\Delta_t}(Z^{(t)})$   
 $\xi \leftarrow \max(\mathbf{1}^N + \Delta_t(N\mathbf{x} - \mathbf{1}^N), 0)$  where  $\mathbf{x} \sim \text{Dir}(\beta)$   
 $\xi \leftarrow N\xi / \sum \xi_i$   
# Select greedy action with distorted expectation  
 $a^* \leftarrow \arg\max_{a'} \mathbb{E}_\xi[Z(s', a')]$   
 $\mathcal{T}\theta_j \leftarrow r + \gamma\theta_j(s', a^*), \quad \forall j$   
 $t \leftarrow t + 1$

**Output:**  $\sum_{i=1}^N \mathbb{E}_j[\rho_{\tau_i}^{\kappa}(\mathcal{T}\theta_j - \theta_i(s, a))]$

---

## 513 D Further experimental results & Discussion

### 514 D.1 N-Chain

| Total Count | (8,10)       | (7,11)       | (6,12)       | (5,13)       | (4,14)       | (3,15)       | (2,16)       | (1,17)       |
|-------------|--------------|--------------|--------------|--------------|--------------|--------------|--------------|--------------|
| QR-DQN      | 12293        | 11381        | 11827        | 12108        | 10041        | 11419        | 9696         | 11619        |
| DLTV        | 9997         | 9172         | 9646         | 9251         | 7941         | 6964         | 7896         | 7257         |
| p-DLTV      | 14344        | 14497        | 13769        | <b>15507</b> | 14469        | <b>14034</b> | 14068        | 13404        |
| PQR         | <b>14546</b> | <b>15018</b> | <b>14693</b> | 15142        | <b>15361</b> | 13859        | <b>14602</b> | <b>14354</b> |

Table 2: Total counts of performing true optimal action with 4 seeds.

515 To explore the effect of intrinsic uncertainty, we run multiple experiments with various reward  
516 settings for the rightmost state as keeping their mean at 9. As the distance between two Gaussians  
517 was increased, the performance of DLTV decrease gradually, while other algorithms show consistent  
518 results. The result implies the interference of fixedness is proportional to the magnitude of the  
519 intrinsic uncertainty and the randomized criterion is effective in escaping from the issue.

### 520 D.2 LunarLander-v2

521 To verify the effectiveness of the proposed algorithm in the complex environment with **high intrinsic**  
522 **uncertainty**, we conduct the experiment on LunarLander-v2. We have focused on three main factors  
523 that increase the intrinsic uncertainty from the structural design of LunarLander environment:

- 524 • **Random initial force:** The lander starts at the top center with an random initial force.
- 525 • **Action stochasticity:** The noise of engines causes different transitions with same action.
- 526 • **Extreme reward system:** If the lander crashes, it receives -100 points. If the lander comes  
527 to rest, it receives +100 points.

528 Therefore, several returns with a fixed policy have a high variance. As previously discussed about the  
529 fixedness from N-Chain environment, we can demonstrate that randomized approaches, PQR and  
530 p-DLTV, outperform other baselines in LunarLander-v2.

### 531 D.3 Atari games

532 We test our algorithm under 30 no-op settings to align with previous works. We compare our baseline  
533 results with results from the DQN Zoo framework [22], which provides the full benchmark results on  
534 55 Atari games at 50M and 200M frames. We report the average of the best scores over 5 seeds for  
535 each baseline algorithms up to 50M frames.

536 However, recent studies tried to follow the setting proposed by Machado et al. [16] for reproducibility,  
537 where they recommended using sticky actions. Hence, we provide all human normalized scores

538 results across 55 Atari games for 50M frames including previous report of Dopamine and DQN Zoo  
539 framework to help the follow-up researchers as a reference. We exclude Defender and Surround  
540 which is not reported on Yang et al. [30] because of reliability issues in the Dopamine framework. In  
541 summary,

- 542 • DQN Zoo framework corresponds to 30 no-op settings (version **v4**).
- 543 • Dopamine framework corresponds to sticky actions protocol (version **v0**).

544 For the expected concerns about the comparison with DLTV, we address some technical issues to  
545 correct misconceptions of their performance. Before we reproduce the empirical results of DLTV,  
546 Mavrin et al. [17] did not report each raw scores of Atari games, but only the relative performance  
547 with cumulative rewards comparing with QR-DQN. While DLTV was reported to have a cumulative  
548 reward 4.8 times greater than QR-DQN, such gain mainly comes from VENTURE which is evaluated  
549 as 22,700% from their metric (i.e., 463% performance gain solely). From their training curves,  
550 however, the approximate raw score of VENTURE was 900 which is lower than our score of 993.3.  
551 So, the report with cumulative rewards causes a misconception that can be overestimated where the  
552 human-normalized score is commonly used for evaluation metrics. Due to the absence of public  
553 results, DLTV were inevitably excluded from the comparison with human-normalized score for  
554 reliability.

|                              | Mean  | Median |
|------------------------------|-------|--------|
| <b>DQN-dopamine(50M)</b>     | 401%  | 51%    |
| <b>DQN-zoo(50M)</b>          | 314%  | 55%    |
| <b>QR-DQN-dopamine(50M)</b>  | 562%  | 93%    |
| <b>QR-DQN-zoo(50M)</b>       | 559%  | 118%   |
| <b>IQN*-dopamine(50M)</b>    | 940%  | 124%   |
| <b>IQN-zoo(50M)</b>          | 902%  | 131%   |
| <b>RAINBOW-dopamine(50M)</b> | 965%  | 123%   |
| <b>RAINBOW-zoo(50M)</b>      | 1160% | 154%   |
| <b>PQR(50M)</b>              | 1121% | 124%   |

Table 3: Mean and median of best scores across 55 Atari games on 50M frames, measured as percentages of human baseline [2, 22, 30]. IQN\* implemented in Dopamine framework is the improved version of original IQN by applying  $n$ -step updates with  $n = 3$ . **Figure 5** also uses the data from IQN\*.

555 Table 3 provides the mean and median human normalized scores across 55 Atari games. Due to the  
556 high computational cost, our algorithm was evaluated on 50M frames to provide results over as many  
557 environments as possible. It is observed that PQR shows better performance in terms of both mean  
558 and median metrics than QR-DQN. Since our method is based on QR-DQN, we expect that PDBOO  
559 can be combined with IQN [9] or techniques in Rainbow [14] as an efficient exploration method, and  
560 the performance can be further improved.

| GAMES            | RANDOM   | HUMAN   | DQN(50M) | QR-DQN(50M) | IQN(50M) | RAINBOW(50M) | PQR(50M)         |
|------------------|----------|---------|----------|-------------|----------|--------------|------------------|
| Alien            | 227.8    | 7127.7  | 1541.5   | 1645.7      | 1769.2   | 4356.9       | <b>2455.8</b>    |
| Amidar           | 5.8      | 1719.5  | 324.2    | 683.4       | 799.2    | 2549.2       | <b>938.4</b>     |
| Assault          | 222.4    | 742.0   | 2387.8   | 11684.2     | 15152.4  | 9737.0       | 10759.2          |
| Asterix          | 210.0    | 8503.3  | 5249.5   | 18373.4     | 32598.2  | 33378.6      | 10490.5          |
| Asteroids        | 719.1    | 47388.7 | 1106.3   | 1503.9      | 1972.6   | 1825.4       | 1662.0           |
| Atlantis         | 12850.0  | 29028.1 | 283392.2 | 937275.0    | 865360.0 | 941740.0     | 897640.0         |
| BankHeist        | 14.2     | 753.1   | 389.0    | 1223.9      | 1266.8   | 1081.7       | 1038.8           |
| BattleZone       | 2360.0   | 37187.5 | 19092.4  | 26325.0     | 30253.9  | 35467.1      | 28470.5          |
| BeamRider        | 363.9    | 16926.5 | 7133.1   | 12912.0     | 19251.4  | 15421.9      | 10224.9          |
| Berzerk          | 123.7    | 2630.4  | 577.4    | 826.5       | 918.9    | 2061.6       | <b>*137873.1</b> |
| Bowling          | 23.1     | 160.7   | 34.4     | 45.4        | 41.5     | 54.7         | <b>*86.9</b>     |
| Boxing           | 0.1      | 12.1    | 87.2     | 99.6        | 99.2     | 99.8         | 97.1             |
| Breakout         | 1.7      | 30.5    | 316.8    | 426.5       | 468.0    | 335.3        | 380.3            |
| Centipede        | 2090.9   | 12017.0 | 4935.7   | 7124.0      | 7008.3   | 5691.4       | <b>*7291.2</b>   |
| ChopperCommand   | 811.0    | 7387.8  | 974.2    | 1187.8      | 1549.0   | 5525.1       | 1300.0           |
| CrazyClimber     | 10780.5  | 35829.4 | 96939.0  | 93499.1     | 127156.5 | 160757.7     | 84390.9          |
| DemonAttack      | 152.1    | 1971.0  | 8325.6   | 106401.8    | 110773.1 | 85776.5      | 73794.0          |
| DoubleDunk       | -18.6    | -16.4   | -15.7    | -10.5       | -12.1    | -0.3         | <b>-7.5</b>      |
| Enduro           | 0.0      | 860.5   | 750.6    | 2105.7      | 2280.6   | 2318.3       | <b>*2341.2</b>   |
| FishingDerby     | -91.7    | -38.7   | 8.2      | 25.7        | 23.4     | 35.5         | <b>31.7</b>      |
| Freeway          | 0.0      | 29.6    | 24.4     | 33.3        | 33.7     | 34.0         | <b>34.0</b>      |
| Frostbite        | 65.2     | 4334.7  | 408.2    | 3859.2      | 5650.8   | 9672.6       | 4148.2           |
| Gopher           | 257.6    | 2412.5  | 3439.4   | 6561.9      | 26768.9  | 32081.3      | <b>*47054.5</b>  |
| Gravitar         | 173.0    | 3351.4  | 180.9    | 548.1       | 470.2    | 2236.8       | <b>635.8</b>     |
| Hero             | 1027.0   | 30826.4 | 9948.3   | 9909.8      | 12491.1  | 38017.9      | <b>12579.2</b>   |
| IceHockey        | -11.2    | 0.9     | -11.4    | -2.1        | -4.2     | 1.9          | <b>-1.4</b>      |
| Jamesbond        | 29.0     | 302.8   | 486.4    | 1163.8      | 1058.0   | 14415.5      | <b>2121.8</b>    |
| Kangaroo         | 52.0     | 3035.0  | 6720.7   | 14558.2     | 14256.0  | 14383.6      | <b>*14617.1</b>  |
| Krull            | 1598.0   | 2665.5  | 7130.5   | 9612.5      | 9616.7   | 8328.5       | <b>*9746.1</b>   |
| KungFuMaster     | 258.5    | 22736.3 | 21330.9  | 27764.3     | 39450.1  | 30506.9      | <b>*43258.6</b>  |
| MontezumaRevenge | 0.0      | 4753.3  | 0.3      | 0.0         | 0.2      | 80.0         | 0.0              |
| MsPacman         | 307.3    | 6951.6  | 2362.9   | 2877.5      | 2737.4   | 3703.4       | <b>2928.9</b>    |
| NameThisGame     | 2292.3   | 8049.0  | 6328.0   | 11843.3     | 11582.2  | 11341.5      | 10298.2          |
| Phoenix          | 761.4    | 7242.6  | 10153.6  | 35128.6     | 29138.9  | 49138.8      | 20453.8          |
| Pitfall          | -229.4   | 6463.7  | -9.5     | 0.0         | 0.0      | 0.0          | <b>0.0</b>       |
| Pong             | -20.7    | 14.6    | 18.7     | 20.9        | 20.9     | 21.0         | <b>21.0</b>      |
| PrivateEye       | 24.9     | 69571.3 | 266.6    | 100.0       | 100.0    | 160.0        | <b>*372.4</b>    |
| Qbert            | 163.9    | 13455.0 | 5567.9   | 12808.4     | 15101.8  | 24484.9      | <b>15267.4</b>   |
| Riverraid        | 1338.5   | 17118.0 | 6782.8   | 9721.9      | 13555.9  | 17522.9      | 11175.3          |
| RoadRunner       | 11.5     | 7845.0  | 29137.5  | 54276.3     | 53850.9  | 52222.6      | 50854.7          |
| Robotank         | 2.2      | 11.9    | 31.4     | 54.5        | 53.8     | 64.5         | <b>60.3</b>      |
| Seaquest         | 68.4     | 42054.7 | 2525.8   | 7608.2      | 17085.6  | 3048.9       | <b>*19652.5</b>  |
| Skiing           | -17098.1 | -4336.9 | -13930.8 | -14589.7    | -19191.1 | -15232.3     | <b>*-9299.3</b>  |
| Solaris          | 1236.3   | 12326.7 | 2031.5   | 1857.3      | 1301.5   | 2522.6       | <b>*2640.0</b>   |
| SpaceInvaders    | 148.0    | 1668.7  | 1179.1   | 1753.2      | 2906.7   | 2715.3       | 1749.4           |
| StarGunner       | 664.0    | 10250.0 | 24532.5  | 63717.3     | 78503.4  | 107177.8     | 62920.6          |
| Tennis           | -23.8    | -8.3    | -0.9     | 0.0         | 0.0      | 0.0          | -1.0             |
| TimePilot        | 3568.0   | 5229.2  | 2091.8   | 6266.8      | 6379.1   | 12082.1      | <b>6506.4</b>    |
| Tutankham        | 11.4     | 167.6   | 138.7    | 210.2       | 204.4    | 194.3        | <b>*231.3</b>    |
| UpNDown          | 533.4    | 11693.2 | 6724.5   | 27311.3     | 35797.6  | 65174.2      | <b>36008.1</b>   |
| Venture          | 0.0      | 1187.5  | 53.3     | 12.5        | 17.4     | 1.1          | <b>*993.3</b>    |
| VideoPinball     | 16256.9  | 17667.9 | 140528.4 | 104405.8    | 341767.5 | 465636.5     | <b>465578.3</b>  |
| WizardOfWor      | 563.5    | 4756.5  | 3459.9   | 14370.2     | 10612.1  | 12056.1      | 6132.8           |
| YarsRevenge      | 3092.9   | 54576.9 | 16433.7  | 21641.4     | 21645.0  | 67893.3      | <b>27674.4</b>   |
| Zaxxon           | 32.5     | 9173.3  | 3244.9   | 9172.1      | 8205.2   | 22045.8      | <b>10806.6</b>   |

Table 4: Raw scores across all 55 games, starting with 30 no-op actions. We report the best scores for DQN, QR-DQN, IQN and Rainbow on 50M frames, averaged by 5 seeds. Reference values were provided by DQN Zoo framework [22]. **Bold** are wins against DQN, QR-DQN and IQN, and \*asterisk are wins over Rainbow.



| GAMES          | RANDOM   | HUMAN   | DQN(50M) | QR-DQN(50M) | IQN*(50M) | RAINBOW(50M) | PQR(50M)        |
|----------------|----------|---------|----------|-------------|-----------|--------------|-----------------|
| Alien          | 227.8    | 7127.7  | 1688.1   | 2754.2      | 4016.3    | 2076.2       | <b>3173.9</b>   |
| Amidar         | 5.8      | 1719.5  | 888.2    | 841.6       | 1642.8    | 1669.6       | <b>*2814.7</b>  |
| Assault        | 222.4    | 742     | 1615.9   | 2233.1      | 4305.6    | 2535.9       | <b>*8456.5</b>  |
| Asteroids      | 719.1    | 47388.7 | 828.2    | 1333.4      | 1336.3    | 1345.1       | 904.6           |
| BankHeist      | 14.2     | 753.1   | 720.2    | 964.1       | 1082.8    | 1104.9       | 501.1           |
| BattleZone     | 2360.0   | 37187.5 | 15110.3  | 25845.6     | 29959.7   | 32862.1      | <b>*61494.4</b> |
| BeamRider      | 343.9    | 16926.5 | 4771.3   | 7143.0      | 7113.7    | 6331.9       | <b>*12217.6</b> |
| Berzerk        | 123.7    | 2630.4  | 529.2    | 603.2       | 627.3     | 697.8        | <b>*2707.2</b>  |
| Bowling        | 23.1     | 160.7   | 38.5     | 55.3        | 33.6      | 55.0         | <b>*174.1</b>   |
| Boxing         | 0.1      | 12.1    | 80.0     | 96.6        | 97.8      | 96.3         | <b>96.7</b>     |
| Breakout       | 1.7      | 30.5    | 113.5    | 40.7        | 164.4     | 69.8         | 41.7            |
| Centipede      | 2090.9   | 12017.0 | 3403.7   | 3562.5      | 3746.1    | 5087.6       | <b>*31079.8</b> |
| ChopperCommand | 811      | 7387.8  | 1615.3   | 1600.3      | 6654.1    | 5982.0       | <b>4480.8</b>   |
| DemonAttack    | 152.1    | 1971.0  | 4396.7   | 3182.6      | 7715.5    | 6346.4       | <b>*19530.2</b> |
| DoubleDunk     | -18.6    | -16.4   | -16.7    | 7.4         | 20.2      | 17.4         | 1.1             |
| Enduro         | 0        | 860.5   | 799.5    | 2062.5      | 766.5     | 2255.6       | 2341.2          |
| FishingDerby   | -91.7    | -38.7   | 12.3     | 48.4        | 41.9      | 37.6         | 31.4            |
| Freeway        | 0        | 29.6    | 25.8     | 33.5        | 33.5      | 33.2         | 32.8            |
| Frostbite      | 65.2     | 4334.7  | 760.2    | 8022.8      | 7824.9    | 5697.2       | <b>*8401.5</b>  |
| Gopher         | 257.6    | 2412.5  | 3495.8   | 3917.1      | 11192.6   | 7102.1       | <b>*12252.9</b> |
| Gravitar       | 173.0    | 3351.4  | 250.7    | 821.3       | 1083.5    | 926.2        | 703.5           |
| Qbert          | 163.9    | 13455.0 | 8216.2   | 17228.0     | 15045.5   | 17121.4      | 15806.9         |
| Robotank       | 2.2      | 11.9    | 25.8     | 53.6        | 65.9      | 63.6         | 48.7            |
| Seaquest       | 68.4     | 42054.7 | 1585.9   | 4667.9      | 20081.3   | 3916.2       | <b>4791.5</b>   |
| Skiing         | -17098.1 | -4336.9 | -17038.2 | -14401.6    | -13755.6  | -17960.1     | <b>*9021.2</b>  |
| Solaris        | 1236.3   | 12326.7 | 2029.5   | 2361.7      | 2234.5    | 2922.2       | <b>*7145.3</b>  |
| SpaceInvaders  | 148.0    | 1668.7  | 1361.1   | 940.2       | 3115.0    | 1908.0       | <b>1602.4</b>   |
| Tennis         | -23.8    | -9.3    | -0.1     | 19.2        | 3.5       | 0.0          | *15.4           |
| TimePilot      | 3568.0   | 5229.2  | 3200.9   | 6622.8      | 9820.6    | 9324.4       | 5304.1          |
| Tutankham      | 11.4     | 167.6   | 138.8    | 209.9       | 250.4     | 252.2        | 145.4           |
| UpNDown        | 533.4    | 11693.2 | 10405.6  | 29890.1     | 44327.6   | 18790.7      | <b>32155.5</b>  |
| Venture        | 0        | 1187.5  | 50.8     | 1099.6      | 1134.5    | 1488.9       | 1000.0          |
| YarsRevenge    | 3092.9   | 54576.9 | 20375.7  | 66055.9     | 57960.3   | 31864.4      | <b>*67545.8</b> |
| Zaxxon         | 32.5     | 9173.3  | 1928.6   | 8177.2      | 12048.6   | 14117.5      | 7010.3          |

Table 5: Raw scores across 34 games. We report the best scores for DQN, QR-DQN, IQN\*, and Rainbow on 50M frames, averaged by 5 seeds. Reference values were provided by Dopamine framework [2]. **Bolds** are wins against DQN, QR-DQN, and \*asterisk are wins over IQN\* and Rainbow. **Note that IQN\* and Rainbow implemented in Dopamine framework applied  $n$ -step updates with  $n = 3$  which improves performance.**
